# Supplementary material for: Rotifer dynamics in three shallow lakes from the Salado river watershed (Argentina): the potential modulating role of incident solar radiation
Source: Royal Society of Chemistry journal article supplement (doi:10.1039/c5pp00125k), 2015-09-22
Supplement: c5pp00125k1.pdf [file c5pp00125k1.pdf]

| Parameters                             | Chascomús |       | Carpincho |      | Gómez North |      | Gómez East |      |
|----------------------------------------|-----------|-------|-----------|------|-------------|------|------------|------|
|                                        | Mean      | SD    | Mean      | SD   | Mean        | SD   | Mean       | SD   |
| Temperature (°C)                       | 16.2      | 5.7   | 19.2      | 6.6  | 19.3        | 5.9  | 18.9       | 6.4  |
| Conductance (mS cm <sup>-1</sup> )     | 2.09      | 0.51  | 5.21      | 2.04 | 5.12        | 2.03 | 4.87       | 1.90 |
| Secchi disk depth (cm)                 | 10.2      | 3.1   | 20.9      | 11.5 | 16.5        | 7.2  | 21.4       | 11.4 |
| Total phosphorus (mg L <sup>-1</sup> ) | 0.66      | 0.22  | 0.92      | 0.33 | 0.97        | 0.29 | 0.90       | 0.32 |
| Total nitrogen (mg L <sup>-1</sup> )   | 2.54      | 2.47  | 5.21      | 2.04 | 6.50        | 2.56 | 5.70       | 1.71 |
| Chlorophyll a (µg L <sup>-1</sup> )    | 328.5     | 174.2 | 103.1     | 69.9 | 112.8       | 58.9 | 84.9       | 35.2 |
| Mean depth (m)                         | 1.85      | 0.30  | 0.97      | 0.11 | 1.29        | 0.14 | 1.24       | 0.15 |

**Table ESI 1:** Average values of some basic limnological variables, standard deviation (SD).

| Treatment             |                    |      | Net reproductive rate ( $R_0$ ) | Generation time (T, day)  | Intrinsic rate of increase ( $r_m$ , day <sup>-1</sup> ) | Finite rate of increase ( $\lambda$ , day <sup>-1</sup> ) | Doubling time (D, day)    |
|-----------------------|--------------------|------|---------------------------------|---------------------------|----------------------------------------------------------|-----------------------------------------------------------|---------------------------|
| (n)                   |                    |      |                                 |                           |                                                          |                                                           |                           |
| <i>B. caudatus</i>    | 20W                | (15) | 14.1                            | 9.9                       | 0.30                                                     | 1.45                                                      | 2.3                       |
|                       | 20S                | (27) | 3.5                             | 7.0                       | 0.19                                                     | 1.21                                                      | 3.6                       |
|                       | 9W                 | (19) | 2.1                             | 28.9                      | 0.03                                                     | 1.03                                                      | 24.6                      |
|                       | 9S                 | (22) | 0.3                             | 28.2                      | -0.04                                                    | 0.96                                                      |                           |
| Effect                | Temperature Season |      | **                              | **                        | --                                                       | --                                                        | --                        |
|                       | Interaction Test   |      | **                              | NS                        | ** at 20°C<br>** at 9°C                                  | ** at 20°C<br>** at 9°C                                   | ** at 20°C<br>** at 9°C   |
|                       |                    |      | 2-way ANOVA                     | 2-way ANOVA               | Kruskal-Wallis                                           | Kruskal-Wallis                                            | Kruskal-Wallis            |
| <i>K. tropica</i>     | 20W                | (17) | 5.0                             | 8.2                       | 0.21                                                     | 1.24                                                      | 3.6                       |
|                       | 20S                | (18) | 3.2                             | 8.0                       | 0.15                                                     | 1.17                                                      | 4.5                       |
|                       | 9W                 | (16) | 3.5                             | 15.6                      | 0.09                                                     | 1.09                                                      | 7.7                       |
|                       | 9S                 | (22) | 1.4                             | 16.6                      | 0.02                                                     | 1.02                                                      | 11.1                      |
| Effect                | Temperature Season |      | **                              | **                        | --                                                       | --                                                        | --                        |
|                       | Interaction Test   |      | NS                              | NS                        | * at 20°C<br>* at 9°C                                    | * at 20°C<br>* at 9°C                                     | NS at 20°C<br>NS at 9°C   |
|                       |                    |      | 2-way ANOVA                     | 2-way ANOVA               | Kruskal-Wallis                                           | Kruskal-Wallis                                            | Kruskal-Wallis            |
| <i>B. havanaensis</i> | 20W                | (18) | 12.6                            | 9.8                       | 0.29                                                     | 1.34                                                      | 2.4                       |
|                       | 20S                | (19) | 12.7                            | 8.3                       | 0.35                                                     | 1.42                                                      | 2.0                       |
| Effect                | Season Test        |      | NS at 20°C<br>Kruskal-Wallis    | ** at 20°C<br>1-way ANOVA | ** at 20°C<br>1-way ANOVA                                | ** at 20°C<br>1-way ANOVA                                 | ** at 20°C<br>1-way ANOVA |

**Table ESI 2.** Population parameters estimated from life-table assays. Individual rotifers were incubated at two temperatures (9 and 20°C) and fed natural seston from Laguna Chascomús produced either in winter (W) or summer (S). Data was preferentially analyzed using 2-way ANOVA. These permitted to test for differences due to the two main factors (temperature and season) as well as for the interaction between them. However, whenever the data failed to meet the assumptions of the parametric test, they were analyzed using the non-parametric Kruskal-Wallis rank test. The latter does not provide an option for testing for the significance of the interaction. Significance level: \*\*:  $p < 0.001$ ; \*:  $p < 0.01$ , NS: not significant, --: not tested.

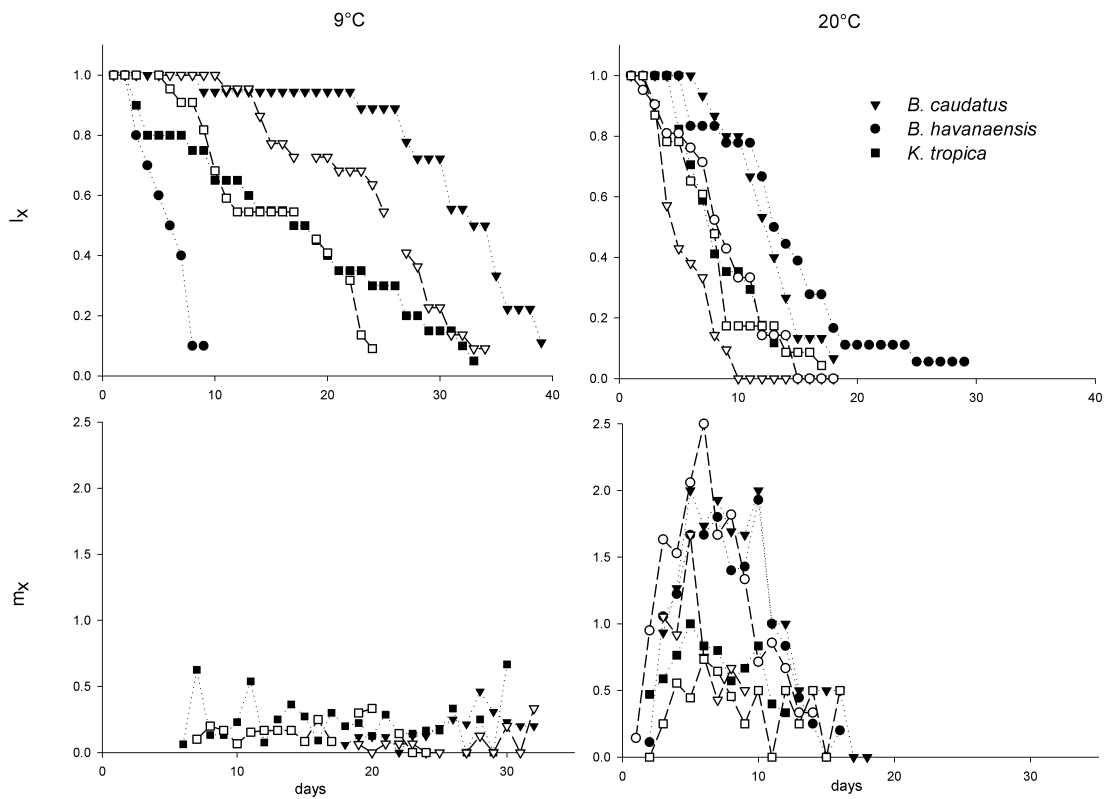

**Figure ESI 1:** Survival,  $l_x$  (upper panels) and fecundity,  $m_x$  (lower panels) of *B. caudatus* (triangles), *B. havanaensis* (circles) and *K. tropica* (squares) over the course of the life-table experiments. Individual rotifers were incubated at two temperatures (9 and 20°C) and fed natural seston from Laguna Chascomús produced either in winter (full symbols) or summer (empty symbols). Notice that at the lowest temperature (9°C) *B. havanaensis* survival was low and it did not reproduce. On the other hand at 20°C, the fecundity of *K. tropica* was lower than that of the two *Brachionus* species.
